# Supplementary material for: High-Performance Hybrid Phototheranostics for NIR-IIb Fluorescence Imaging and NIR-II-Excitable Photothermal Therapy
Source: MDPI journal article supplement (doi:10.3390/pharmaceutics15082027), 2023-07-27
Supplement: s1 [file s1]

## Supplementary Materials

# High-Performance Hybrid Phototheranostics for NIR-IIb Fluorescence Imaging and NIR-II-Excitable Photothermal Therapy

Qi Wang <sup>1</sup>, Xinmin Zhang <sup>1</sup>, Youguang Tang <sup>1</sup>, Yanwei Xiong <sup>1</sup>, Xu Wang <sup>1</sup>, Chunlai Li <sup>2,\*</sup>,  
Tangxin Xiao <sup>3</sup>, Feng Lu <sup>1,\*</sup> and Mengze Xu <sup>4,\*</sup>

<sup>1</sup> State Key Laboratory for Organic Electronics and Information Displays & Institute of Advanced Materials (IAM), Nanjing University of Posts & Telecommunications, Nanjing 210023, China

<sup>2</sup> Department of Liver Surgery, Shanghai Institute of Transplantation, Shanghai Engineering Research Center of Transplantation and Immunology, Renji Hospital, School of Medicine, Shanghai Jiao Tong University, Shanghai 200127, China

<sup>3</sup> Jiangsu Key Laboratory of Advanced Catalytic Materials and Technology, School of Petrochemical Engineering, Changzhou University, Changzhou 213164, China

<sup>4</sup> Center for Cognition and Neuroergonomics, State Key Laboratory of Cognitive Neuroscience and Learning, Beijing Normal University, Zhuhai 519087, China

\* Correspondence: chunlai.lee@gmail.com (C.L.); iamflu@njupt.edu.cn (F.L.); mengzexu@bnu.edu.cn (M.X.)

## 1. Synthesis of Se-TC

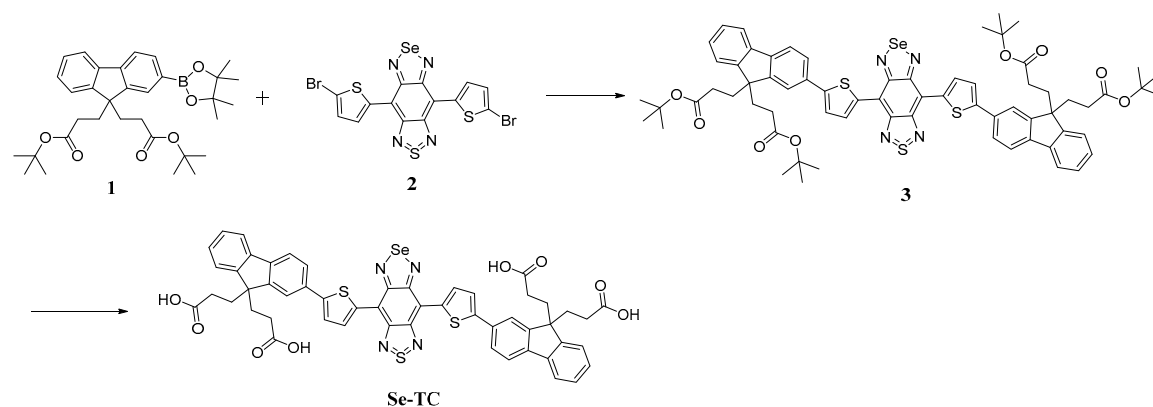

**Scheme S1.** Synthesis of Se-TC.

### Synthesis of compound 3

Compound 1<sup>[S1]</sup> (154 mg, 0.281 mmol), compound 2<sup>[S2]</sup> (72 mg, 0.128 mmol), Pd(PPh<sub>3</sub>)<sub>4</sub> (99 mg), K<sub>2</sub>CO<sub>3</sub> (100 mg) were added in toluene (15 mL)/water (3 mL). The solution was stirred for 24 h at 95°C under nitrogen, and the solvent was evaporated. Compound 3 could be obtained via column chromatography (84 mg, 52.6%). <sup>1</sup>H NMR (400 MHz, CDCl<sub>3</sub>, δ): 9.11 (d, 2H), 7.85 (d, 2H), 7.80 (s, 2H), 7.74 (t, 4H), 7.64 (d, 2H), 7.43-7.36 (m, 6H), 2.47-2.42 (m, 8H), 1.43-1.33 (m, 8H), 1.31 (s, 36H). MALDI-TOF MS (m/z): [M]<sup>+</sup> calcd. for C<sub>68</sub>H<sub>70</sub>N<sub>4</sub>O<sub>8</sub>S<sub>3</sub>Se, 1246.352; found, 1246.667.

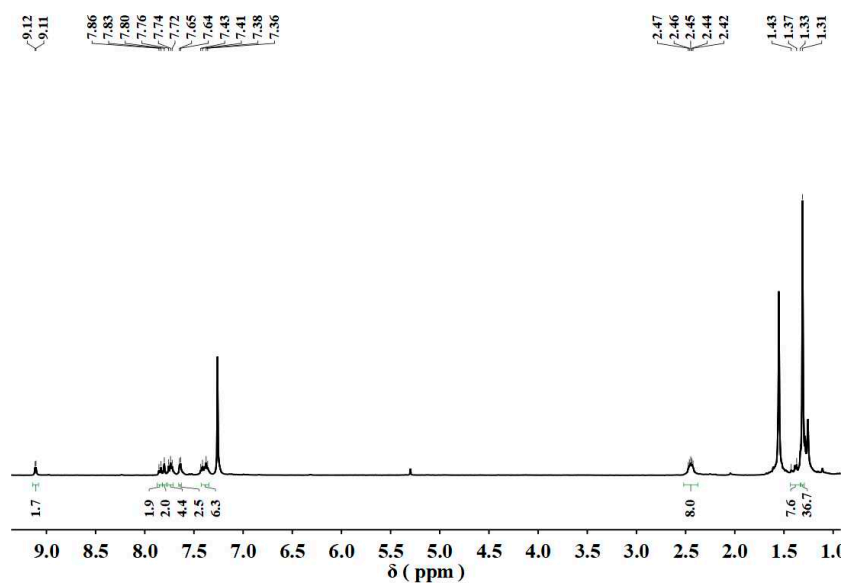

**Figure S1.** <sup>1</sup>H NMR spectrum of compound 3.

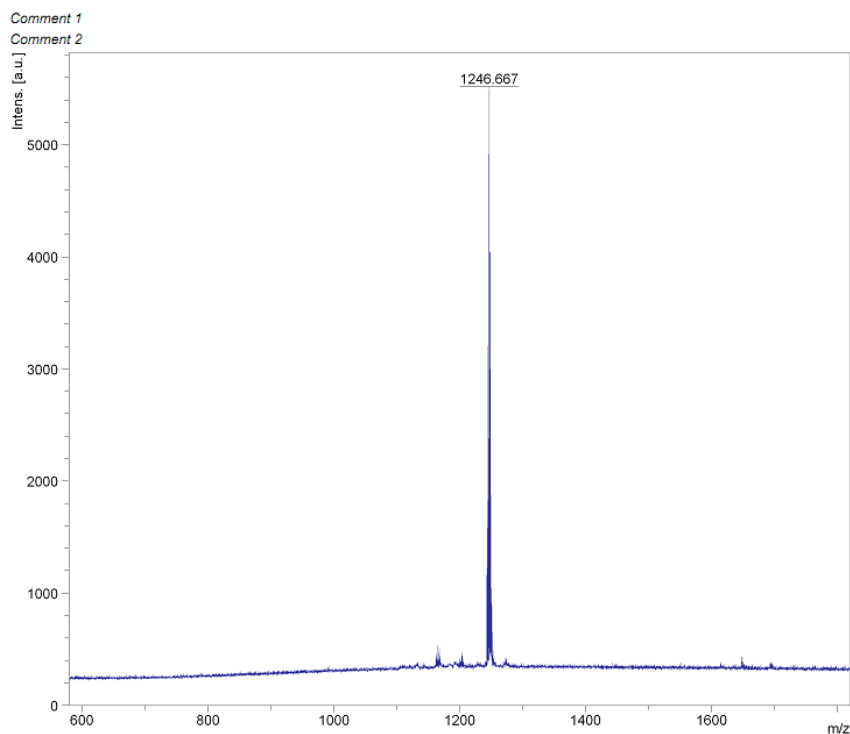

**Figure S2.** MALDI-TOF MS plot of compound 3.

### Synthesis of Se-TC

Compound 3 (80 mg, 0.064 mmol), TFA (3 mL) were added in DCM (15 mL). The solution was stirred for 12 h at room temperature. After extraction and washing, the solvent was evaporated, and a black solid was obtained, and directly used in the following step.

### **2. Absorption spectrum of Se-TC in THF**

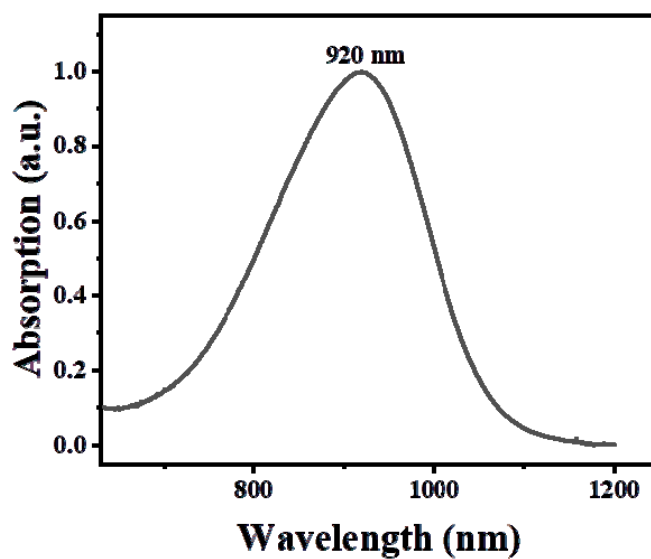

**Figure S3.** Absorption spectrum of Se-TC in THF.

### 3. NIR-II emission spectrum of RENP in chloroform

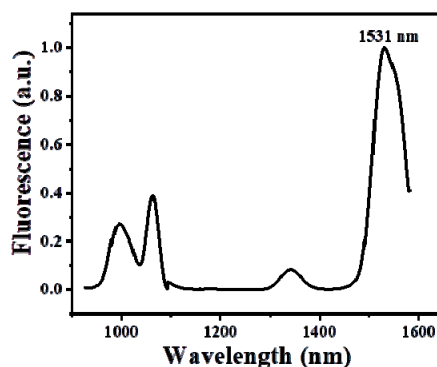

Figure S4. NIR-II emission spectrum of RENP in chloroform.

### 4. Extinction coefficient of Se-TC@RENP@F

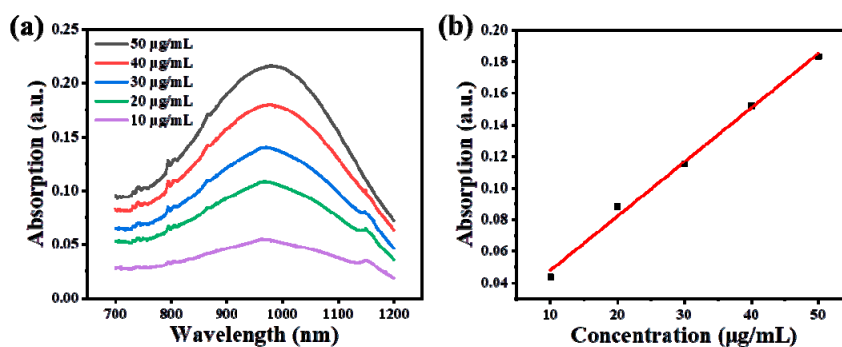

Figure S5. (a) Absorption curves of Se-TC@RENP@F at different concentrations. (b) Linear absorbance versus concentration obtained from (a).

### 5. The biocompatibility of Se-TC@RENP@F in vivo

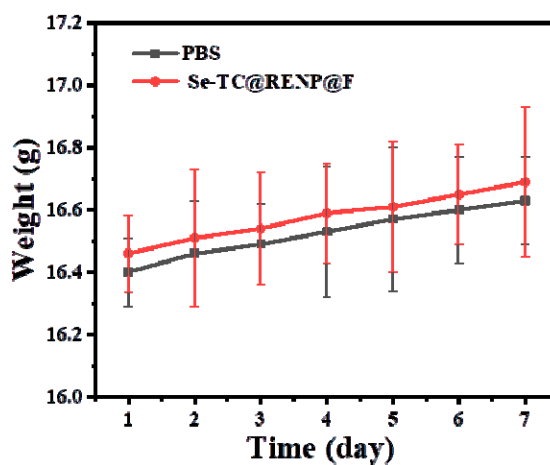

Figure S6. The body weight changes of healthy mice treated with PBS and Se-TC@RENP@F.

***References:***

[S1] X. Liu, R. Zhu, Y. Zhang, B. Liu, S. Ramakrishna, *Chem. Commun.* **2008**, 3789–3791, doi: 10.1039/B805060K.

[S2] Y. Cao, R. Yang, W Yang, Chinese Patent CN1389488 A, 08-01-2003.
